# Supplementary material for: AIF3 splicing switch triggers neurodegeneration
Source: Springer Nature journal article supplement (doi:10.1186/s13024-021-00442-7), 2021-04-14
Supplement: MOESM1 [file 19065584]

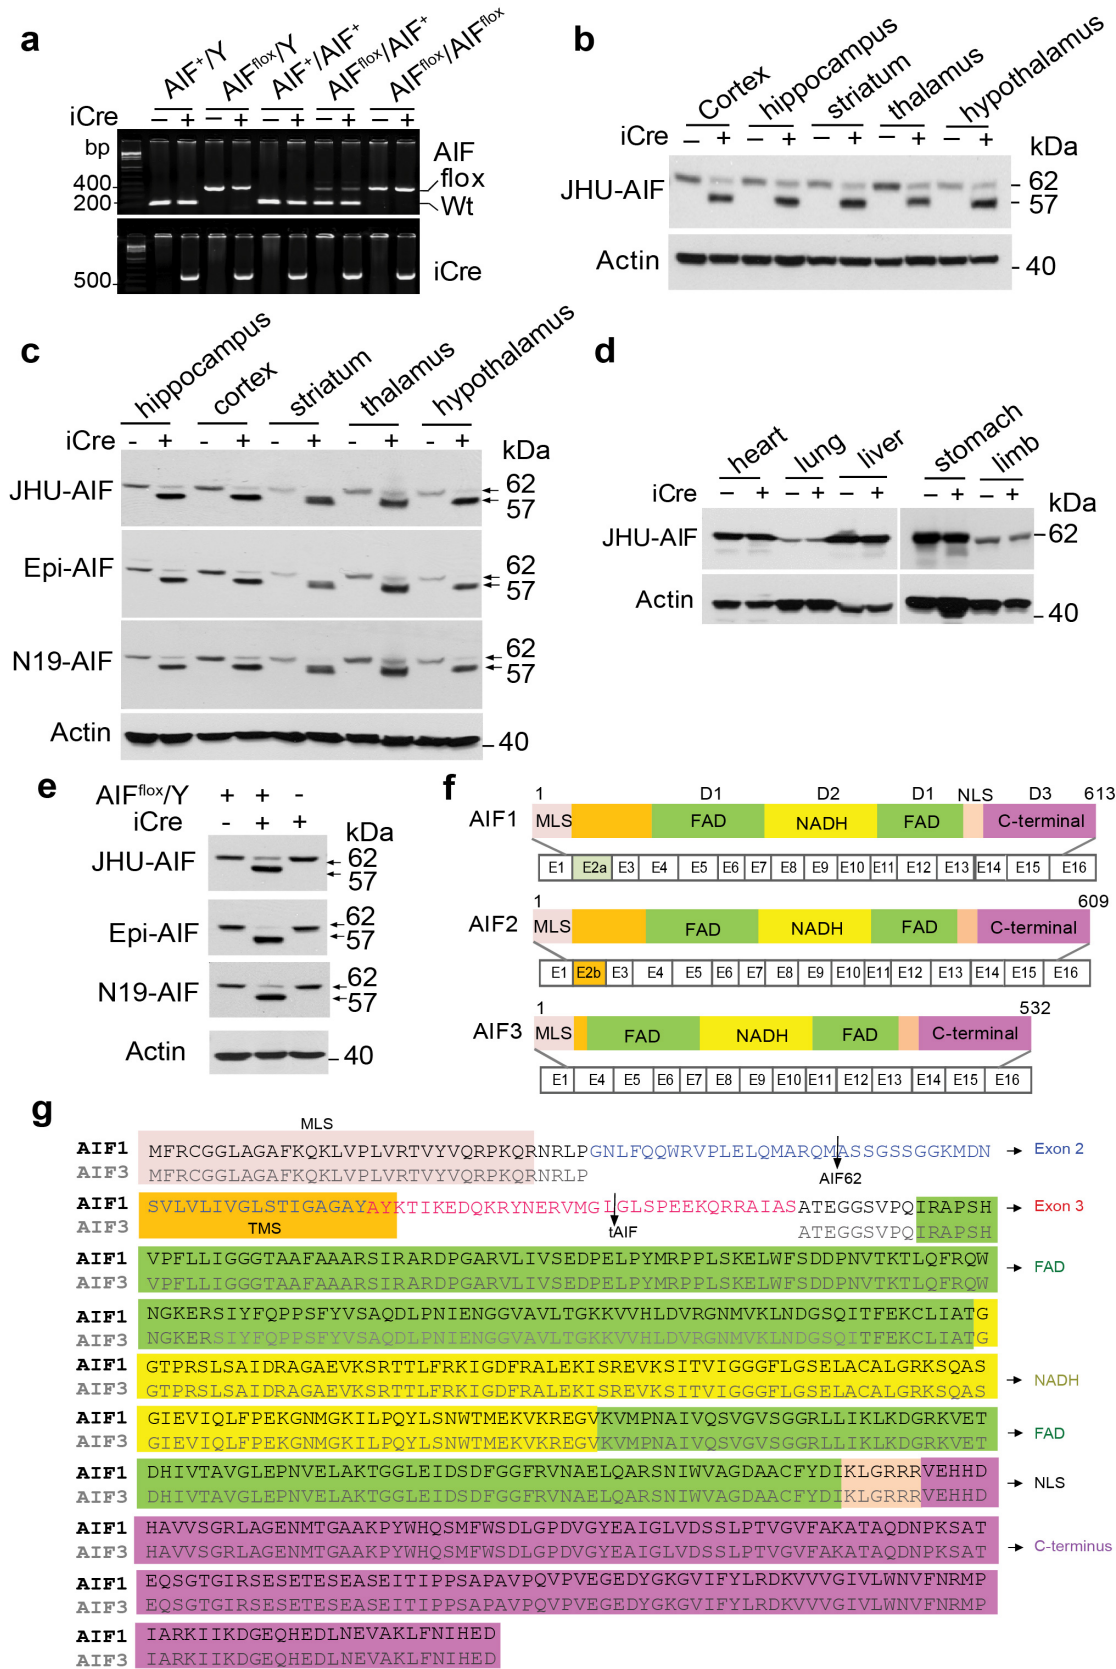

Supplementary Figure 1. Identification of AIF3 isoform. a, PCR analysis of CamKII $\alpha$ -iCre

recombination at the AIF locus in 7-day-old AIF<sup>fl/Y</sup> or AIF<sup>fl/fl</sup> mice (PCR ID: AIFgeno and iCre, Table 2). **b**, Expression of AIF3 in different brain regions from AIF<sup>fl/Y</sup> mice with or without CamKII $\alpha$ -iCre recombination at P20 determined by JHU-532 AIF antibody. **c & d**, Expression of AIF3 in different brain regions (**c**) and other organs (**d**) from AIF<sup>fl/Y</sup> mice with or without CamKII $\alpha$ -iCre recombination at P70 determined by different AIF antibodies. **e**, No AIF3 was expressed in CamKII $\alpha$ -iCre control mice at P70 determined by 3 different AIF antibodies. **f**, Scheme of the novel AIF3 isoform. AIF3 contains 14 exons skipping exons 2 and 3. **g**, Protein sequence and functional domains of mouse AIF3.
