# Supplementary material for: AIF3 splicing switch triggers neurodegeneration
Source: Springer Nature journal article supplement (doi:10.1186/s13024-021-00442-7), 2021-04-14
Supplement: MOESM2 [file 19065584]

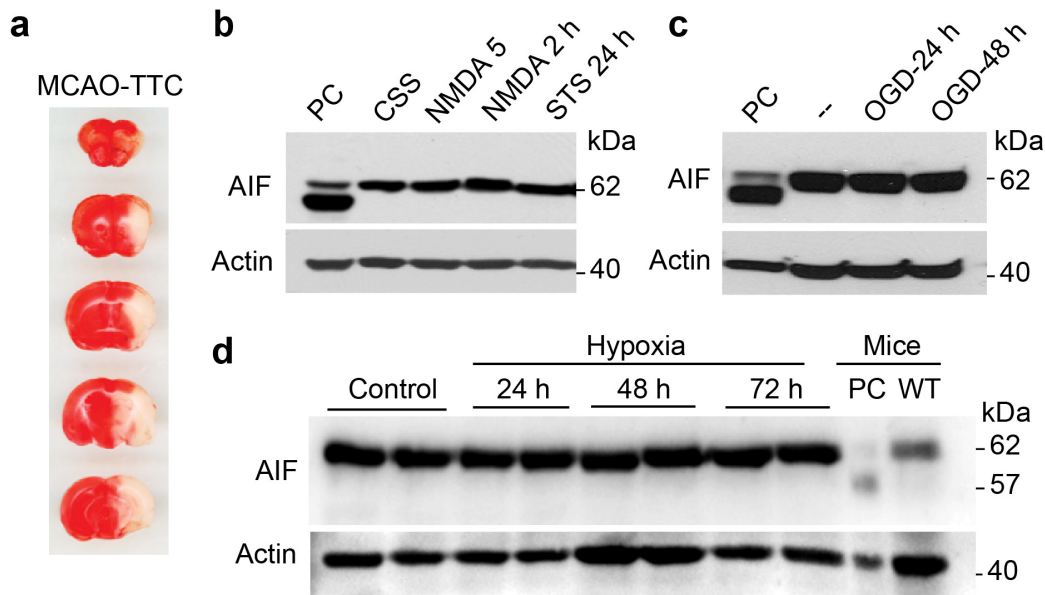

**e**

| Id | Age     | Sex | Diagnosis                                               | Regions |
|----|---------|-----|---------------------------------------------------------|---------|
| 1  | 63 yrs  | M   | normal                                                  | Cortex  |
| 2  | 73 yrs  | F   | normal                                                  | Cortex  |
| 3  | 35 yrs  | F   | normal                                                  | Cortex  |
| 4  | 30 yrs  | F   | normal                                                  | Cortex  |
| 5  | 35 yrs  | M   | normal                                                  | Cortex  |
| 6  | 11 yrs  | F   | normal                                                  | Cortex  |
| 7  | 3 mon   | F   | Acute hypoxic ischemic Infarction,                      | Cortex  |
| 8  | 6 mon   | M   | old germinal matrix hemorrhage                          | Cortex  |
| 9  | 14 yrs  | M   | vascular malformation with hemorrhage, diffuse ischemia | Cortex  |
| 10 | 20 days | F   | Hypoxic ischemic injury                                 | Cortex  |
| 11 | 3 mon   | M   | Hypoxic ischemic injury                                 | Cortex  |

**Supplementary Figure 2. Expression of AIF3 in neurons in vitro and mouse cortex under different pathological conditions.** **a**, TTC staining of C57BL/6 mouse brain at 24 h reperfusion after 2 h MCAO. **b**, Expression of AIF3 in cortical neurons 24 h after NMDA (500  $\mu$ M for 5 min or 100  $\mu$ M for 2 h) or Staurosporine (STS, 1  $\mu$ M) treatment. CSS, control saline solution. PC (positive control), cortical lysate of AIF3 splicing mice. **c**, Expression of AIF3 in cortical neurons at 24 h and 48 h after exposure to OGD for 90 min. PC, cortical lysate of AIF3 splicing mice. **d**, Expression of AIF3 in cortical neurons exposed to 24 h, 48 h and 72 h hypoxia (1% O<sub>2</sub>). PC, cortical lysate of AIF3 splicing mice. **e**, De-identified human stroke patients' information.

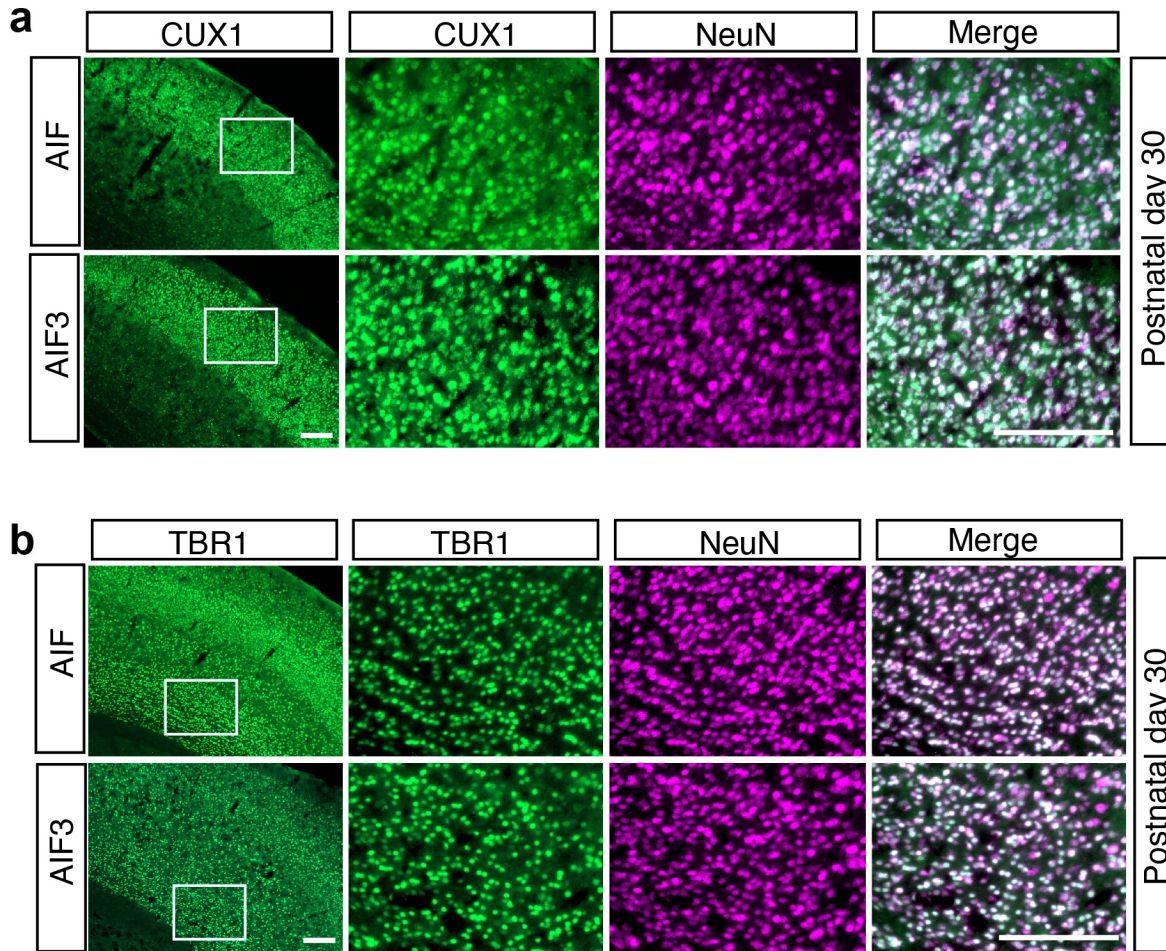

**Supplementary Figure 3. Characterization of neuron marker expression in the cortex of AIF3 splicing mice at P30.** **a**, Representative images of CUX1+/NeuN+ neurons in AIF3 splicing mice ( $AIF^{fl/Y}/CamKII\alpha-iCre+$ ) and littermate control AIF mice ( $AIF^{fl/Y}/CamKII\alpha-iCre-$ ) at P30. **b**, Representative images of TBR1+ /NeuN+ neurons in AIF3 splicing mice ( $AIF^{fl/Y}/CamKII\alpha-iCre+$ ) and littermate control AIF mice ( $AIF^{fl/Y}/CamKII\alpha-iCre-$ ) at P30. Scale bar, 200  $\mu$ m.
